# Supplementary material
Source: Royal Society of Chemistry journal article supplement (doi:10.1039/d6nj00801a)
Supplement: d6nj00801a1.pdf [file d6nj00801a1.pdf]

# Ligand-protected precipitation of cobalt over silica nanospheres for catalytic oxidation of toluene

Xingrui Wang<sup>‡a</sup>, Jiahui Yan<sup>‡a</sup>, Xin Yang<sup>a</sup>, Weilong Chun<sup>a</sup>, Zhao Yang<sup>a</sup>, Jiatang Shao<sup>a</sup>,  
Huiyong Chen<sup>\*ab</sup>

<sup>a</sup> School of Chemical Engineering, Northwest University, Xi'an, Shaanxi 710069, China.

<sup>b</sup> International Science & Technology Cooperation Base for Clean Utilization of Hydrocarbon Resources, Chemical Engineering Research Center of the Ministry of Education for Advanced Use Technology of Shanbei Energy, Collaborative Innovation Center for Development of Energy and Chemical Industry in Northern Shaanxi, Northwest University, Xi'an, Shaanxi 710069, China.

\* Corresponding authors:

Prof. Huiyong Chen

Phone: (+86) 150 2993 2016

E-mail: [hychen@nwu.edu.cn](mailto:hychen@nwu.edu.cn)

<sup>‡</sup> Xingrui Wang and Jiahui Yan contributed equally to this work.

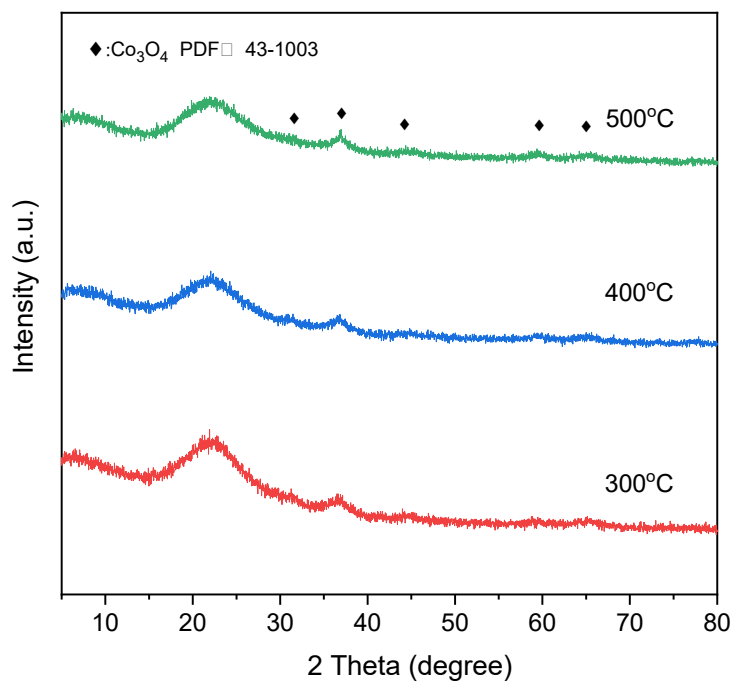

**Fig. S1.** XRD patterns of 10Co/SiO<sub>2</sub>\_LP calcined at various temperatures.

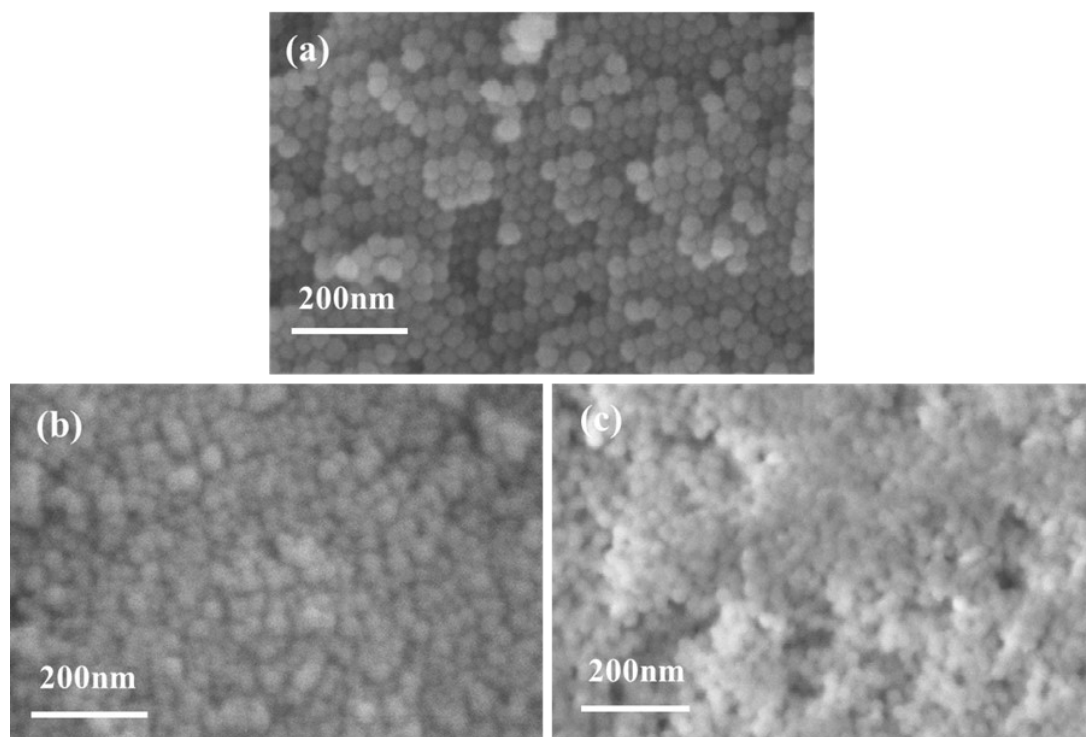

**Fig. S2** SEM images of (a) SiO<sub>2</sub> support, (b) 10Co/SiO<sub>2</sub>\_IM, and (c) 10Co/SiO<sub>2</sub>\_LP

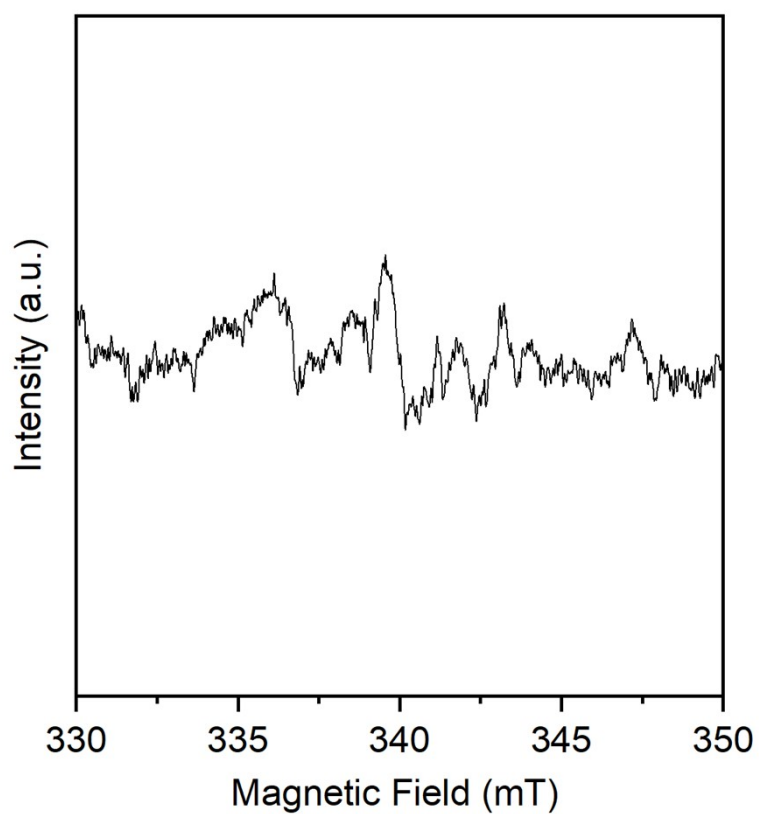

**Fig. S3** EPR spectrum of the 10Co/SiO<sub>2</sub>\_LP sample calcined at 300°C

**Table S1** Particles sizes of Co<sub>3</sub>O<sub>4</sub> in 10Co/SiO<sub>2</sub>\_IM and 10Co/SiO<sub>2</sub>\_LP.

| Sample                    | Co <sub>3</sub> O <sub>4</sub> particle size (nm) |      |
|---------------------------|---------------------------------------------------|------|
|                           | XRD                                               | TEM  |
| 10Co/SiO <sub>2</sub> _IM | 12.1                                              | 8-20 |
| 10Co/SiO <sub>2</sub> _LP | 3.6                                               | 2-6  |

**Table S2.** Binding energies and Co<sup>3+</sup>/Co<sup>2+</sup> ratios of various Co/SiO<sub>2</sub> catalysts.

| Catalyst sample                 | Binding energy (eV)<br>$\Delta$ (Co 2p <sub>3/2</sub> -Co 2p <sub>1/2</sub> ) | Co <sup>3+</sup> /Co <sup>2+</sup> | Co <sup>3+</sup> /(Co <sup>2+</sup> + Co <sup>3+</sup> ) |
|---------------------------------|-------------------------------------------------------------------------------|------------------------------------|----------------------------------------------------------|
| 6Co/SiO <sub>2</sub> _LP_400°C  | 15.3 (795.9-780.6)                                                            | 0.88                               | 0.47                                                     |
| 8Co/SiO <sub>2</sub> _LP_400°C  | 15.3 (795.7-780.4)                                                            | 1.04                               | 0.51                                                     |
| 10Co/SiO <sub>2</sub> _IM_400°C | 15.3 (795.7-780.4)                                                            | 0.87                               | 0.47                                                     |
| 10Co/SiO <sub>2</sub> _LP_400°C | 15.3 (795.4-780.1)                                                            | 1.06                               | 0.51                                                     |
| 12Co/SiO <sub>2</sub> _LP_400°C | 15.2 (795.5-780.3)                                                            | 0.94                               | 0.48                                                     |
| 10Co/SiO <sub>2</sub> _LP_300°C | 15.3 (795.7-780.4)                                                            | 1.15                               | 0.54                                                     |
| 10Co/SiO <sub>2</sub> _LP_500°C | 15.3 (795.7-780.4)                                                            | 0.86                               | 0.46                                                     |

**Table S3.** T<sub>10</sub>, T<sub>50</sub> and T<sub>90</sub> values of toluene oxidation over various Co/SiO<sub>2</sub> catalysts.

| Catalyst                        | T <sub>10</sub> /°C | T <sub>50</sub> /°C | T <sub>90</sub> /°C |
|---------------------------------|---------------------|---------------------|---------------------|
| 6Co/SiO <sub>2</sub> _LP_400°C  | 188                 | 240                 | 260                 |
| 8Co/SiO <sub>2</sub> _LP_400°C  | 171                 | 235                 | 255                 |
| 10Co/SiO <sub>2</sub> _IM_400°C | 206                 | 250                 | 271                 |
| 10Co/SiO <sub>2</sub> _LP_400°C | 170                 | 230                 | 250                 |
| 12Co/SiO <sub>2</sub> _LP_400°C | 166                 | 230                 | 250                 |
| 10Co/SiO <sub>2</sub> _LP_300°C | 150                 | 220                 | 235                 |
| 10Co/SiO <sub>2</sub> _LP_500°C | 176                 | 232                 | 254                 |

Note: T<sub>10</sub>, T<sub>50</sub>, and T<sub>90</sub> represent the temperatures corresponding to toluene conversion rates of 10%, 50%, and 90%.

**Table S4.** T<sub>10</sub>, T<sub>50</sub> and T<sub>90</sub> values of toluene oxidation over 10Co/SiO<sub>2</sub>\_LP at various reaction conditions.

| Toluene concentration | Space velocity (ml/g·h) | T <sub>10</sub> /°C | T <sub>50</sub> /°C | T <sub>90</sub> /°C |
|-----------------------|-------------------------|---------------------|---------------------|---------------------|
| 100 ppm               | 45000                   | 150                 | 220                 | 235                 |
| 400 ppm               | 45000                   | 200                 | 230                 | 240                 |
| 700 ppm               | 45000                   | 220                 | 248                 | 257                 |
| 100 ppm               | 70000                   | 160                 | 225                 | 237                 |
| 100 ppm               | 120000                  | 175                 | 228                 | 240                 |

Note: T<sub>10</sub>, T<sub>50</sub>, and T<sub>90</sub> represent the temperatures corresponding to toluene conversion rates of 10%, 50%, and 90%.

**Table S5.** Comparison of toluene oxidation performance of 10Co/SiO<sub>2</sub>\_LP with the reported Co-based catalysts.

| Catalyst                                   | Catalyst dosage (g) | Toluene concentration (ppm) | Space velocity (ml·g <sup>-1</sup> ·h <sup>-1</sup> ) | T <sub>90</sub> (°C) | Long-term stability (h) | References       |
|--------------------------------------------|---------------------|-----------------------------|-------------------------------------------------------|----------------------|-------------------------|------------------|
| 0.5CMO/3DOM-Al <sub>2</sub> O <sub>3</sub> | 0.08 g(0.008 g),    | 1000                        | 30000                                                 | 274                  | -                       | [1]              |
| ε-MnO <sub>2</sub>                         | - (-)               | 500                         | 60000                                                 | 243                  | -                       | [2]              |
| pompon-like Co <sub>3</sub> O <sub>4</sub> | - (-)               | 500                         | 60000                                                 | 298                  |                         | [3]              |
| 10% CoOx/g-C <sub>3</sub> N <sub>4</sub>   | 0.05g(0.005g)       | 1000                        | 156000                                                | 279                  | >36                     | [4]              |
| CuO/Co <sub>3</sub> O <sub>4</sub> -S      | 0.1g(0.02g),        | 500                         | 10000                                                 | 246                  | >100                    | [5]              |
| CoCeO <sub>x</sub> /Beta                   | - (-)               | 1000                        | 10000                                                 | 307                  | -                       | [6]              |
| Co <sub>3</sub> O <sub>4</sub>             | 0.1 g(0.1 g)        | 1000                        | 60000                                                 | 270                  | -                       | [7]              |
|                                            | 0.2 g(0.02 g)       | 100                         | 45000                                                 | 235                  | >100                    | <b>This work</b> |
| 10Co/SiO <sub>2</sub> _LP_300°C            | 0.2 g(0.02 g)       | 700                         | 45000                                                 | 257                  | >100                    | <b>This work</b> |
|                                            | 0.2 g(0.02 g)       | 100                         | 120000                                                | 240                  | >100                    | <b>This work</b> |

## References

- [1] J. Vélez, G. E. González, L. Urán, J. Arboleda, A. Echavarría, M. Velasquez, R. Molina, S. Moreno and C. Ostos, *Applied Surface Science*, 2025, **708**, 163736.
- [2] M. T. Nguyen Dinh, C. C. Nguyen, T. L. Truong Vu, V. T. Ho and Q. D. Truong, *Applied Catalysis A: General*, 2020, **595**, 117473.

- [3] W. Liu, R. Liu, H. Zhang, Q. Jin, Z. Song and X. Zhang, *Applied Catalysis A: General*, 2020, **597**, 117539.
- [4] C. Miao, J. Liu, J. Zhao, Y. Quan, T. Li, Y. Pei, X. Li and J. Ren, *New Journal of Chemistry*, 2020, **44**, 11557-11565.
- [5] W. Liu, H. Yu, S. Yang, Z. Song, X. Chen and X. Zhang, *Environmental Research*, 2024, **248**, 118411.
- [6] Y. Wang, S. Wu, G. Wu, N. Fang, Y. Chu and J. Guo, *Microporous and Mesoporous Materials*, 2022, **343**, 112158.
- [7] Rokicińska A, Natkański P, Dudek B, et al, *Applied Catalysis B: Environmental*, 2016, **195**, 59-68.
